1 **THE CENTRAL NERVIIOUS SYSTEM ACTS AS A TRANSDUCER OF**  
2 **STRESS-INDUCED MASCULINIZATION THROUGH CORTICOTROPIN-**  
3 **RELEASING HORMONE B**

4 Castañeda Cortés DC\*, Arias Padilla LF\*, Langlois VS<sup>†</sup>, Somoza GM<sup>#</sup>, Fernandino  
5 JI\*<sup>‡</sup>.

6 \* Laboratorio de Biología del Desarrollo - Instituto Tecnológico de Chascomús.  
7 INTECH (CONICET-UNSAM), Argentina.

8 <sup>†</sup> Institut national de la recherche scientifique (INRS) - Centre Eau Terre  
9 Environnement, Quebec, Canada.

10 <sup>#</sup> Laboratorio de Ictiofisiología y Acuicultura - INTECH (CONICET-UNSAM),  
11 Argentina.

12 <sup>‡</sup>To whom correspondence should be addressed. Dr. Juan Ignacio Fernandino +542241-  
13 430323 ext. 107. E-mail: [fernandino@intech.gov.ar](mailto:fernandino@intech.gov.ar)

14 **Keywords:** Environmental stress, CRH, Masculinization, CRISPR/Cas9, Medaka

15 **ABSTRACT**

16 Exposure to environmental stressors during early development has important  
17 implications for rescheduling many cellular and molecular mechanisms. In some fish  
18 species, environmental stressors, like high temperatures (HT), cause an increase in  
19 cortisol levels. In turn, this mechanism induces sex reversal of genotypic females,  
20 overriding genetic factors related to development of the gonad. However, the  
21 involvement of the brain in this process is not well clarified. In the present work, we  
22 investigated the mRNA levels of corticotropin-releasing hormone b (*crhb*) and its  
23 receptors (*crhr1* and *crhr2*), and found out that they were up-regulated at HT during the  
24 critical period of gonadal sex determination in medaka (*Oryzias latipes*), i.e., when the  
25 gonadal primordium is sexually labile. In order to clarify their roles in sex reversal,  
26 biallelic mutants for *crhr1* and *crhr2* were produced by CRISPR/Cas9 technology.  
27 Remarkably, biallelic mutant of both *loci* (*crhr1* and *crhr2*) did not undergo female-to-  
28 male sex reversal upon HT exposition, whereas mutants for either *crhr1* or *crhr2*  
29 showed partial, or intersex phenotypes, suggesting that both *crh* receptors are required  
30 for HT-induced masculinization. Inhibition of this process in double *crhrs* mutants  
31 could be successfully rescued through the administration of the downstream effector of  
32 the hypothalamic-pituitary interrenal axis, the cortisol. Taken together, these results  
33 revealed for the first time the participation of the central nervous system acting as a  
34 transducer of masculinization induced by thermal stress.

## 35 INTRODUCTION

36 As a general trend, the response of the neuroendocrine system to environmental  
37 stressors produces the elevation of the hypothalamic corticotropin-releasing hormone  
38 (CRH). CRH in turn stimulates the secretion and release of adrenocorticotrophic  
39 hormone (ACTH) from the pituitary gland (Aguilera & Liu, 2012; Kovacs, 2013),  
40 regulating cortisol levels through the adrenal gland (Mommensen, Vijayan, & Moon,  
41 1999). This axis is known as hypothalamic-pituitary-adrenal (HPA) or the -interrenal  
42 (HPI) in tetrapods and fish, respectively. In this last group, two *crh* ohnologs, named as  
43 *crha* and *crhb*, have been identified (Grone & Maruska, 2015). The expression of *crha*  
44 has been mainly observed in the retina (Grone & Maruska, 2015; Kohei Hosono et al.,  
45 2015), with weak expression in the brain (about 100 times less than in retina) of fish  
46 (Kohei Hosono et al., 2015). On the other hand, the expression pattern of *crhb* was  
47 mainly characterized in the central nervous system (CNS), i.e., in the preoptic area, the  
48 hypothalamus, and the caudal neurosecretory system. For this reason, it has been related  
49 with the control of Acth in the pituitary gland (Alderman & Bernier, 2009; Bernier,  
50 Alderman, & Bristow, 2008; Carpenter, Maruska, Becker, & Fernald, 2014; Chen &  
51 Fernald, 2008; Grone & Maruska, 2015).

52 The action of CRH in the pituitary is mediated by the binding and activation of two  
53 highly conserved membrane receptors (CRH-R1 and -R2), which belong to class B of  
54 the G protein-coupled receptors (Lovejoy, Chang, Lovejoy, & del Castillo, 2014).  
55 Although in tetrapods, it has been reported that CRH has higher affinity for activate  
56 CRH-R1 (Vaughan et al., 1995), in teleosts, both Crhs have similar affinity for both Crh

57 receptors (Kohei Hosono et al., 2015). Several studies in mammals have also  
58 demonstrated the ability of CRH receptors antagonists to block stress responses, such as  
59 anxiety or depression (Backstrom & Winberg, 2013; Grammatopoulos & Chrousos,  
60 2002; Holsboer & Ising, 2008), placing CRH receptors at a critical point in regulation of  
61 HPA axis.

62 The molecular and morphological processes of masculinization by stress have been  
63 investigated at local, gonadal level, from nematodes (Christopher H. Chandler,  
64 Chadderdon, Phillips, Dworkin, & Janzen, 2012; C. H. Chandler, Phillips, & Janzen,  
65 2008), fish (Hattori et al., 2007; Hayashi et al., 2010; Kitano, Hayashi, Shiraishi, &  
66 Kamei, 2012) and amphibians (M. Nakamura, 2009), to reptiles (Ge et al., 2018; Mork,  
67 Czerwinski, & Capel, 2014; Yatsu et al., 2015), but the involvement of the brain in sex-  
68 reversal is still under scrutiny. In all these vertebrates, exposure to environmental  
69 stressors during early life has several implications in reproduction. For instance, when  
70 reptiles and fish are exposed to stress during the critical period of gonadal  
71 differentiation, a strong bias in sex ratios can be induced (Capel, 2017; Fernandino,  
72 Hattori, Moreno Acosta, Strüssmann, & Somoza, 2013). The downstream factors  
73 involved in stress-induced masculinization in fish are well known (Hattori et al., 2009;  
74 Hayashi et al., 2010; Mankiewicz et al., 2013; Ribas et al., 2017; Tsalafouta et al., 2014;  
75 Yamaguchi, Yoshinaga, Yazawa, Gen, & Kitano, 2010), which in turn can act by three  
76 different mechanisms: (i) inhibition of estrogens synthesis (Kitano et al., 2012; Nozu &  
77 Nakamura, 2015), (ii) elevation of androgen synthesis (Fernandino, Hattori, Kishi,  
78 Strüssmann, & Somoza, 2012; Hattori et al., 2009), and (iii) apoptosis or meiotic arrest

79 of germ cells (Yamaguchi & Kitano, 2012; Yamamoto et al., 2013). However, the  
80 molecular processes and key players controlling cortisol increase, that regulates these  
81 three mechanisms, remain unexplored.

82 In this study we provide clear evidence of the role of CNS in the regulation of the HPI  
83 axis, shedding light on the triggering mechanism of masculinization induced by  
84 environmental factors.

85

## 86 **RESULTS**

### 87 *Expression of corticotropin-related genes reared at HT*

88 First we examine the ontogeny of both *crh* paralogs regulation under normal and  
89 masculinizing temperature. The mRNA levels of *crha* and *crhb* were analyzed in  
90 medaka embryos at stages 26, 33 and 37, incubated at control (24 °C; CT) or high (32  
91 °C; HT) temperatures (Fig. 1). No differences were detected for *crha* between  
92 treatments, in any of the developmental stage (Fig. 1A). In contrast, we observed high  
93 transcript levels of *crhb* at HT for stage 37, corresponding to the gonadal sex  
94 determination period (Fig. 1B). Noteworthy, the expression levels of both *crha* and *crhb*  
95 were not affected by the sex genotype (XX vs XY) (Fig. S1).

96 Based in the up-regulation of *crhb* at stage 37 in embryos incubated at HT, we analyzed  
97 the transcript abundance of other HPI-related genes, such as *crh* receptors (*crhr1* and  
98 *crhr2*), the three urocortins, i.e., the urocortin1 (Ucn1)/sauvagine (Sv)/urotensin 1  
99 (Uts1), the urocortin2 (Ucn2), and the urocortin 3 (Ucn3) (Fig. 2A) (K. Hosono,

100 Yamashita, Kikuchi, Hiraki-Kajiyama, & Okubo, 2017); and *acth* (Liu et al., 2003).  
101 Additionally, the expression of both *crhrs*, *crhr1* and *crhr2* (Fig. 2 E-F, respectively),  
102 was up-regulated at HT. No significant differences were observed in the transcript  
103 abundance of the other Crh-like genes, i.e., *uts1*, *ucn2*, and *ucn3* (Fig. 2B-D), and for  
104 *acth* (Fig. 2G), suggesting that these HPI axis-related genes are not regulated at the  
105 transcriptional level during exposure to thermal stress during early development.

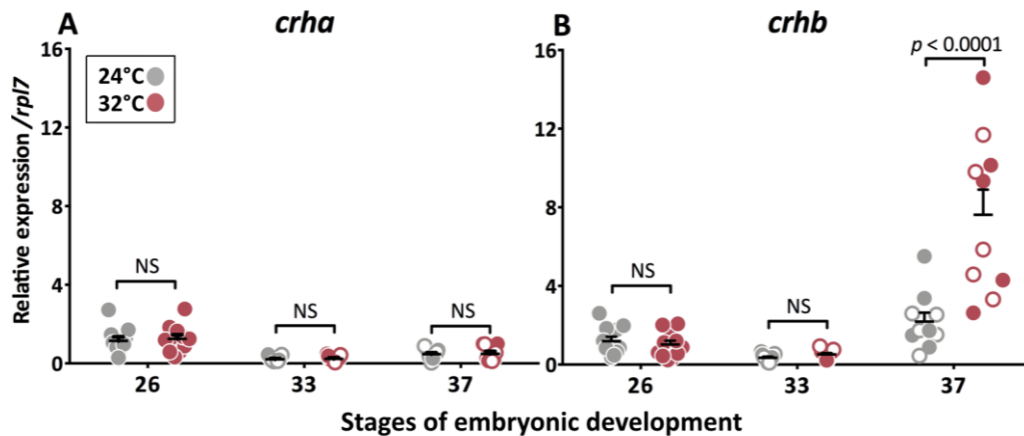

106

107 **Fig. 1.** Developmental profiles of *crha* (A) and *crhb* (B) transcript abundance in embryos reared at 24 °C  
108 (control temperature) and 32 °C (high temperature). Data were measured by qPCR analysis in whole  
109 embryos at stages 26, 33, and 37. Gene expression levels are expressed relatively to the stage 26 group  
110 from 24 °C treatment. Quantification method was performed using the  $2^{-\Delta\Delta C_t}$  method and values were  
111 normalized by the respective values of *rpl7*. Genotypic sex was determined at stages 33 and 37 by the  
112 presence/absence of the *dmy* gene; XX and XY are represented by filled circles and open circles,  
113 respectively. Horizontal bars indicate mean, with its respective standard error of the mean. The *p* values  
114 are indicated when transcript abundance between temperature treatments at the same developmental stage  
115 differ statistically (FgStatistics;  $p < 0.05$ ).

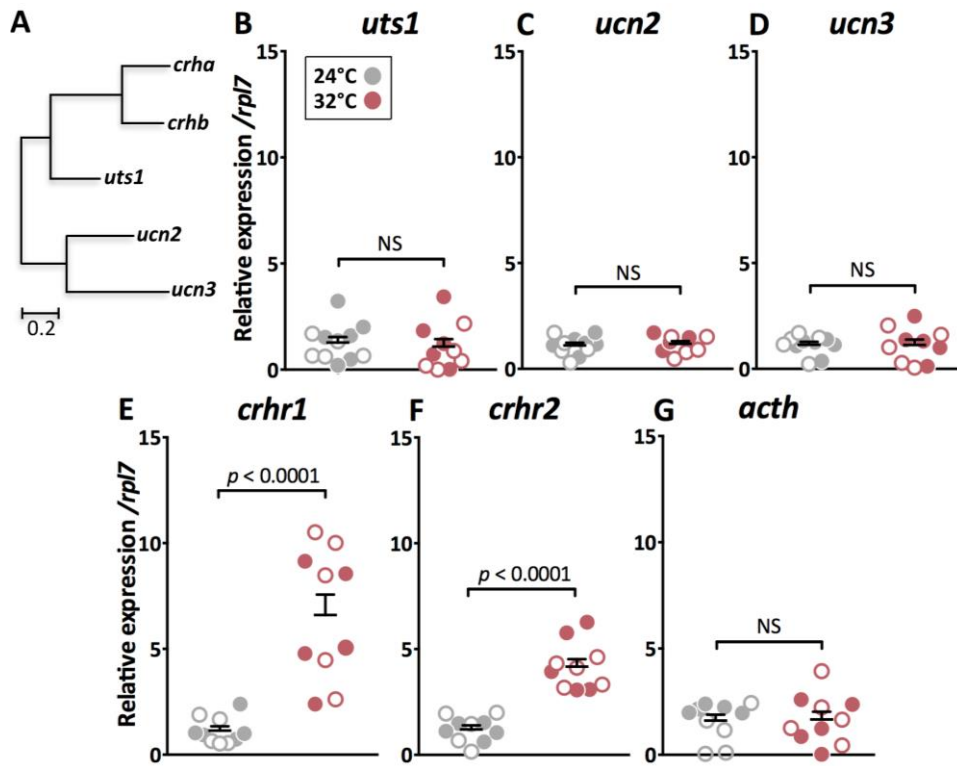

116

117 **Fig. 2.** (A) Phylogenetic tree showing the relationship among Crh family peptides in medaka, obtained by  
118 Neighbor-joining method and a bootstrap test (MEGA 7.0 software). The scale beneath the tree reflects  
119 sequence distances. Genbank accession sequences are provided in Table 1. Gene expression profiles of  
120 urocortins (B-D), *crh* receptors (E-F), *acth* (G), and *gsdf* (H) in XX (filled circles) and XY (open circles)  
121 embryos reared at 24 °C and 32 °C. These data were measured by qPCR analysis in whole embryos at  
122 stage 37. Gene expression levels are expressed relatively to the 24 °C treatment. Quantification method  
123 was performed using the  $2^{-\Delta\Delta Ct}$  method and values were normalized by the respective values of *rpl7*.  
124 Genotypic sex was determined by the presence/absence of the *dmy* gene, XX and XY are represented by  
125 filled circles and open circles, respectively. Horizontal bars indicate mean, with its respective standard  
126 error of the mean. The *p* values are indicated when transcript abundance between temperature treatments  
127 at the same developmental stage differ statistically (FgStatistics;  $p < 0.05$ ).

128 **Generation of biallelic mutation of *crhr1* and *crhr2* using CRISPR/Cas9 technology**

129 To analyze the participation of the HPI axis in temperature-induced masculinization, we  
130 disrupted this axis through the biallelic mutations of *crhr1* or/and *crhr2* using  
131 CRISPR/Cas9 technology. Biallelic mutations of both Crh receptors generated indels in  
132 the transmembrane domain resulting in a receptor with a protein segment that fails to  
133 anchor into the membrane lipid bilayer, and then unable to activate the intracellular G  
134 coupled protein (Grammatopoulos, 2012). Thus, the sgRNAs for *crhr1* and *crhr2* genes  
135 were designed at the exons 7 (located in the transmembrane helix 3) and 10 (located in  
136 the transmembrane helix 6; Fig. S2A), respectively. These sgRNAs were synthesized *in*  
137 *vitro*, and co-injected with *nCas9n* RNA (*cas9*) into one-cell-stage embryos. The  
138 mutagenesis efficiency for each sgRNA was analyzed by the heteroduplex mobility  
139 assay (HMA; Fig. S2B) (Ota et al., 2013), which reached 99.6 % for sgRNA-*crhr1* and  
140 100 % for sgRNA-*crhr2* (Fig. S3A and S3B). Additionally, some biallelic positive  
141 amplifications were sequenced to confirm the indels presence (Fig. S2C). Data indicate  
142 that most cells contained biallelic indels, and consequently, loss of function in *crhr1* and  
143 *crhr2* mutants. Additionally, the potential off-target sites for each sgRNAs were  
144 searched in the medaka genome using the Medaka Pattern Match Tool  
145 (<http://viewer.shigen.info/meda-kavw/crisprtool/>) and CCTop - CRISPR/Cas9 target  
146 online predictor (Stemmer, Thumberger, del Sol Keyer, Wittbrodt, & Mateo, 2015).  
147 None of the embryos analyzed presented indels on the off-target sites for each of the  
148 injected sgRNAs (Fig. S3A and S3B).



149 Moreover, no morphological and survival alterations were observed in a batch of  
150 animals reared at 24°C (CT) up to 60 days post-hatching (dph) in term of morphological  
151 and survival (Fig. S4).

152 ***Genotypic female biallelic crhrs mutants did not show HT-induced masculinization***

153 In order to assess the participation of Crh-related genes in the sex reversion of genotypic  
154 females to phenotypic males induced by HT, we analyzed the expression of well-known  
155 gene markers for gonadal sex differentiation in fish, such as *gsdf*, *sry-box9 type 2α*  
156 (*sox9a2*), gonadal aromatase (*cyp19a1a*, estrogen-related gene) and hydroxysteroid 11-  
157 beta dehydrogenase 2 (*hsd11b2*, androgen-related gene) (Chakraborty, Zhou,  
158 Chaudhari, Iguchi, & Nagahama, 2016; Fernandino et al., 2012; Imai, Saino, &  
159 Matsuda, 2015; Kurokawa et al., 2007; S. Nakamura et al., 2012; Shibata et al., 2010;  
160 X. Zhang et al., 2016; Zhou et al., 2016). Fertilized eggs were coinjected with *cas9*  
161 RNA and sgRNA for each of *crhr* (*cas9+sgRNA-crhr1* or *cas9+sgRNA-crhr2*) alone or  
162 together (*cas9+sgRNA-crhr1+-crhr2*); and they were then incubated at HT (32 °C).  
163 Control fertilized eggs were injected only with *cas9* and then incubated at CT and HT  
164 (*cas9-24* °C and *cas9-32* °C, respectively; Fig. 3A). In all treatments, genotypic females  
165 (XX, *dmy*<sup>-/-</sup>) that presented indels were selected for analysis of gene expression at stage  
166 37. As expected, *cas9-32* °C individuals presented higher levels of *gsdf* and *sox9a2*, and  
167 lower of *cyp19a1a* expression levels when was compared to *cas9-24* °C individuals  
168 (Fig. 3B, 3C and 3D, respectively), evidencing the molecular mechanism of action of  
169 masculinization induced by HT. However, the double biallelic *crhrs* mutant of  
170 genotypic females at HT showed a female pattern of lower *gsdf* and *sox9a2* expression

171 levels, and higher of *cyp19a1a*, resembling those of *cas9*-24 °C group (Fig. 3B, 3C, and  
 172 3D).

173 When each biallelic *crhr* mutants of XX embryos were analyzed the gene expression  
 174 pattern showed an intermediate phenotype, with high *gsdf*, *sox9a2* and *cyp19a1a* (Fig.  
 175 3B, 3C, and 3D). Here it is necessary to take into account that in the biallelic mutant of  
 176 each *crh* receptor as the *crhr* paralog is fully active. Moreover, we analyzed the  
 177 expression pattern of the androgen-related gene, *hsd11b2*, which did not show  
 178 differences between treatments (Fig. 3F).

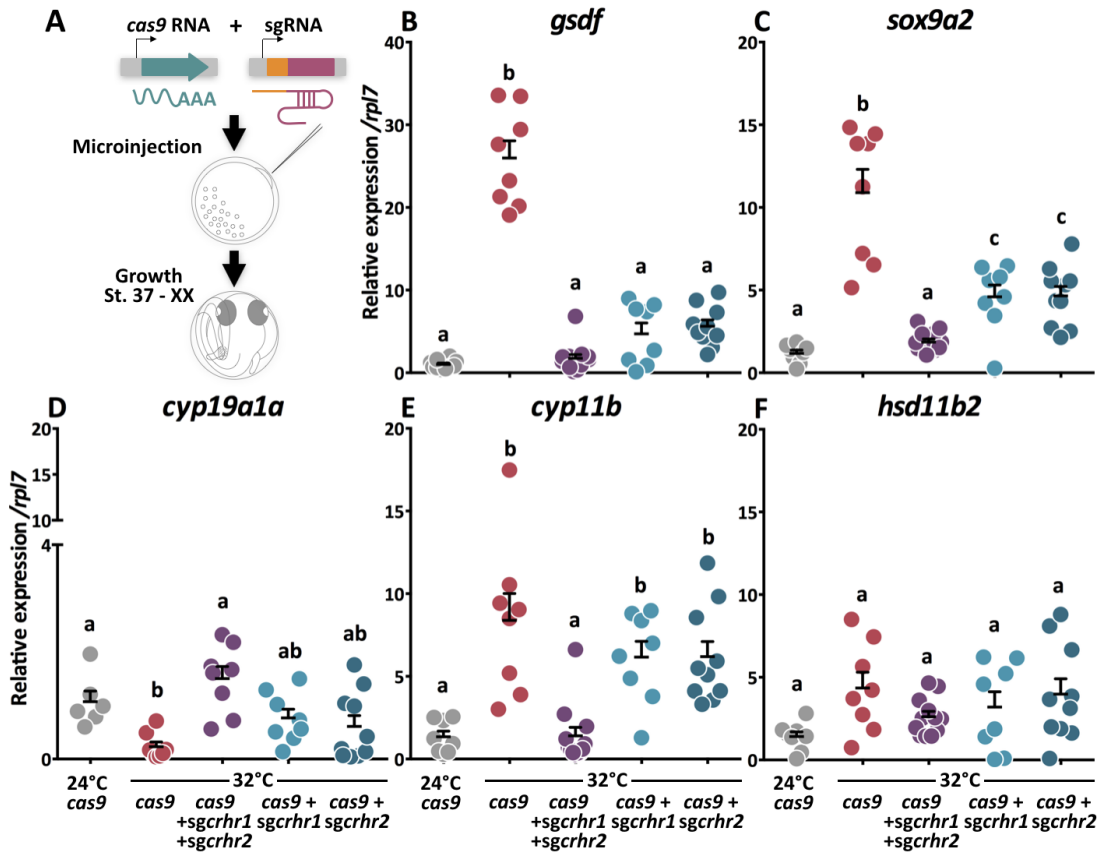

179

180 **Fig. 3.** (A) Schematic representation of experimental procedure used to analyze the effect of loss function  
 181 in *crh* receptors. (B) Transcript abundance profiles of testicular genes markers: *gsdf* and *sox9a2* (B-C,

182 **respectively**), the ovarian gene marker: *cyp19a1a* (**D**), interrenal gland gene marker *cyp11b* (**E**), and the  
183 androgen-related gene *hsd11b2* (**F**), in the control (*cas9* injected embryos reared at 24 °C and 32 °C) and  
184 biallelic *crh* receptors mutants: *cas9*+sgRNA-*crhr1*, *cas9*+sgRNA-*crhr2* and *cas9*+sgRNA-*crhr1*+*crhr2*  
185 coinjected embryos reared at 32 °C. These data were measured by qPCR analysis in whole embryos with  
186 genotypic sex XX at stage 37. Gene expression levels are expressed relative to *cas9* at the 24 °C  
187 treatment. Quantification method was performed using the  $2^{-\Delta\Delta Ct}$  method and values were normalized by  
188 the respective values of *rpl7*. Horizontal bars indicate mean, with its respective standard error of the  
189 mean. Different letters indicate statistically significant differences between treatments (one-way  
190 ANOVA, followed by a Tukey's multiple comparison test;  $p < 0.05$ ).

### 191 ***Crhrs are necessary to elicit sex reversion by high temperature***

192 Besides the expression of testis and ovary-related gene markers, we also analyzed  
193 gonadal morphology of XX biallelic *crhr* mutants that were incubated at HT until  
194 hatching and thereafter at 26 °C (breeding temperature) for 20 dph, when gonad could  
195 be morphologically well differentiated. XX juveniles injected with *cas9* (control) and  
196 incubated at HT until hatching presented 68.8 % of sex reversion toward males, as  
197 evidenced by testis morphology (Fig. 4A and 4C). At 24 °C no reversal was found, with  
198 all fish showing normal ovary development (Fig. 4A and 4B). The double biallelic *crhrs*  
199 mutant showed a wide-ranging insensitivity to HT-induced female-to-male sex reversal,  
200 with all XX individuals presenting normal ovary morphology (Fig. 4A, and 4B).  
201 Moreover, in case of the biallelic *crhr1* mutant sex-reversed individuals were observed  
202 in 19 % of individuals (Fig. 4A and 4C). However, 19 % of intersex individuals were  
203 obtained, i.e., animals with ovaries containing spermatocytes (ova-testis; Fig. 4D).

204 Finally, XX biallelic *crhr2* mutant juveniles showed 35% of sex reversal and 10 % of  
205 intersex gonads (Fig. 4A, 4C and 4D).

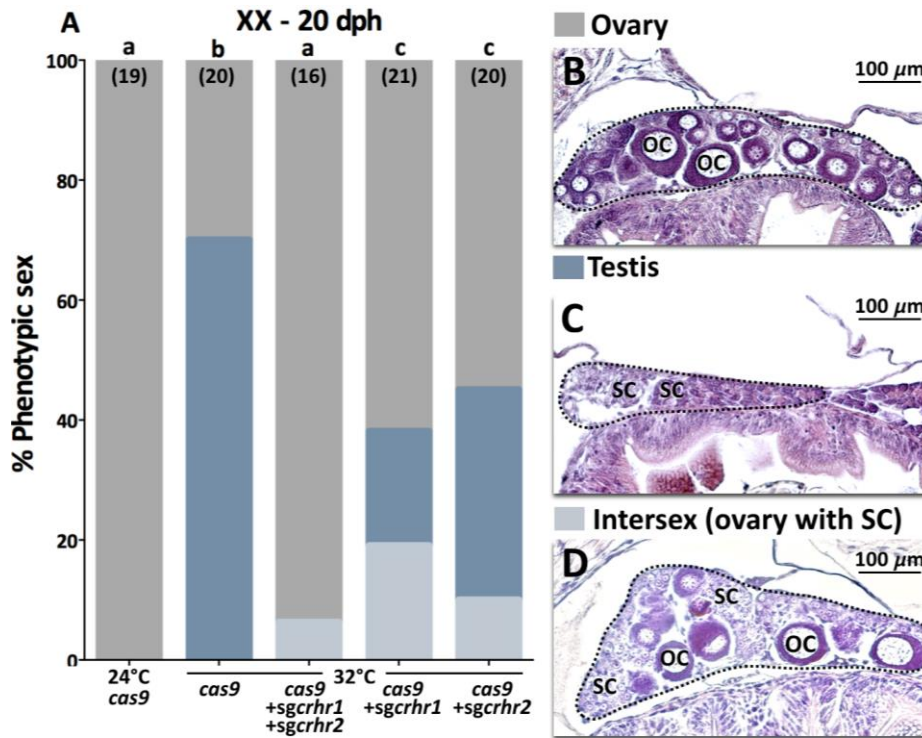

206

207 **Fig. 4.** Participation of *crhrs* in the sex reversal induced by HT. (A) Percentages of genetic females (XX)  
208 with sex-reversed testicular morphology, (B) ovary (OC, oocytes), (C) testis with spermatocytes (SC),  
209 and (D) intersex (OC with SC) in embryos injected with *cas9* (control), *cas9*+sgRNA-*crhr1*,  
210 *cas9*+sgRNA-*crhr2* and *cas9*+sgRNA-*crhr1*+sgRNA-*crhr2*. The number of medaka juveniles analyzed  
211 in each treatment is shown between brackets. Different letters indicate statistically significant differences  
212 between treatments (one-way ANOVA, followed by a Tukey's multiple comparison test;  $p < 0.05$ ).

213 ***Biallelic mutations of crhr exhibit inhibition of Acth release and lack of cortisol***

214 ***increase***

215 As we previously did not observe a correlation between the up-regulation of *crhb* and  
216 the *acth* transcript abundance (Fig. 1, and 2), we measured the Acth-immunoreactive

217 (Acth-ir) cells using immunofluorescence in the pituitary of genotypic female embryos  
218 at stage 39, with or without functional receptors and incubated them at HT (Fig. 5A).  
219 Firstly, we observed differences in the fluorescence intensity of the Acth-ir cells in XX  
220 embryos incubated at control and high temperature (Fig. 5B, 5C, and 5H), suggesting  
221 that thermal stress induces Acth release. Moreover, we measured Acth-ir in biallelic  
222 *crhrs* mutants and observed higher fluorescence intensity in relation to embryos  
223 incubated at HT (Fig. 5C, 5D, 5E, 5F, and S5), resembling the XX *cas9* control  
224 embryos (Fig. 5B, and S5). These results show that the biallelic mutation of *crhrs* in XX  
225 embryos causes the accumulation of Acth in pituitary cells, indicating that both *crh*  
226 receptors are mostly related to Acth release in stress response induced by high  
227 temperature.

228 To corroborate that biallelic mutations of *crhrs* do disrupt the HPI axis, the level of  
229 cortisol and the mRNA expression of P450 11-beta (*cyp11b*), enzyme expressed by the  
230 interrenal gland involved in cortisol synthesis (Montero et al., 2015), were measured in  
231 all treatment. We observed in both biallelic *crhr1* and *crhr2* mutants an increase of  
232 cortisol levels at the end of the gonadal sex determination period. On the other hand, the  
233 levels of cortisol in the double biallelic *crhr* mutant were completely suppressed (Fig.  
234 5H). Moreover, *cyp11b* was up-regulated at HT and down-regulated in the double  
235 biallelic *crhrs* mutant (Fig. 3E), showing that the gene involved in the synthesis of  
236 cortisol is transcriptionally active; *hsd11b2*, which is involved in cortisol catabolism  
237 and 11-oxygenated androgen synthesis, did not show differences between treatments  
238 (Fig. 3F).

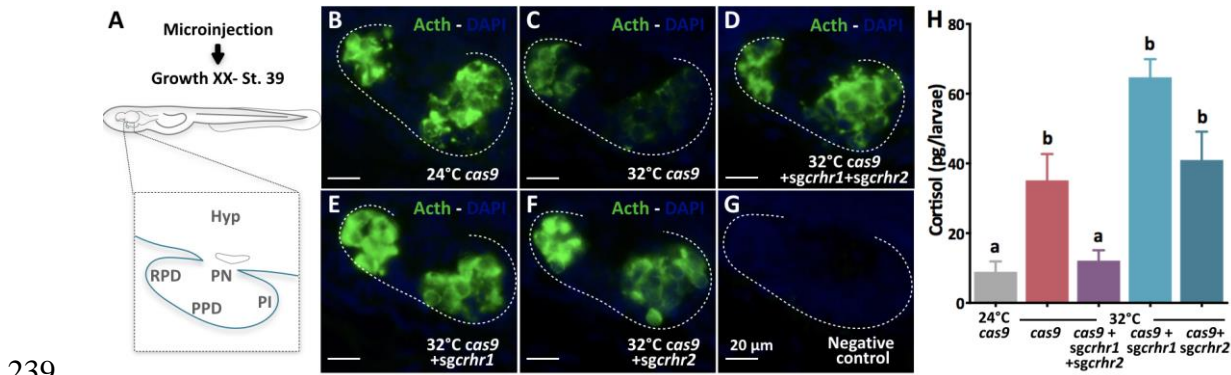

240 **Fig. 5.** (A) Schematic representation of pituitary gland. Fluorescent images of Acth-ir cells in the pituitary  
241 of embryos injected with *cas9* RNA showing the negative control without (B) and with signal for Acth  
242 (C), *cas9*+sgRNA-*crhr1* (D), and *cas9*+sgRNA-*crhr2* (E) coinjected embryos reared at 32°C until stage  
243 39. (F) Quantification of cortisol levels in embryos injected with *cas9* (controls at 24 °C and 32 °C),  
244 *cas9*+sgRNA-*crhr1*, *cas9*+sgRNA-*crhr2* and both *cas9*+*crh* receptors at 32 °C. Horizontal bars indicate  
245 mean, with its respective standard error of the mean. Different letters indicate statistically significant  
246 differences between treatments (one-way ANOVA, followed by a Tukey's multiple comparison test;  $p <$   
247 0.05).

### 248 ***Cortisol exposure rescued the lack of sex reversal phenotype in crhrs mutants***

249 In view that the entire HPI axis seems to be functional during the critical period of  
250 gonadal fate and the biallelic mutations in *crhrs* inhibited masculinization of genotypic  
251 females incubated at HT, we decided to test whether the addition of cortisol could  
252 rescue the absence of sex reversal in the mutants. Therefore, we performed an  
253 experiment in which all embryos were maintained in an embryo medium with or  
254 without cortisol (5 µM) from fertilization to 5 dph (Fig. 6A) (Hayashi et al., 2010). The  
255 double biallelic *crhrs* mutants showed a transcription the phenotype of XX at HT, with

256 a low transcript abundance of *gsdf* (Fig. 6B), a typical XX-24 °C *gsdf* expression  
257 pattern.

258 Finally, the treatments of XX biallelic *crhr1* mutant, treated with or without cortisol at  
259 HT, presented high levels of *gsdf*, similar to control XX *cas9* injected larvae (Fig. 6B),  
260 suggesting that the XX biallelic *crhr1* mutant is not sufficient to induce a female (low)  
261 pattern of *gsdf*. These results are in agreement with the high level of cortisol observed at  
262 stage 39 (Fig. 5I). However, XX biallelic *crhr2* mutants larvae reared at HT maintained  
263 low transcript abundance of *gsdf* (Fig. 6B), a typical female-like expression pattern.

264 Most importantly, XX biallelic *crhr2* mutant reared with 5 μM cortisol at HT showed a  
265 male-like (high) *gsdf* expression pattern, similar to XX *cas9*-injected XX fish (Fig. 6B).

266 To better understand the compensatory molecular mechanism, we analyzed the  
267 transcript abundance of the *crhr2* and *crhr1* in the XX biallelic *crhr1* and *crhr2* mutant,  
268 respectively. We also observed an up-regulation of the *crhr2* in the XX biallelic *crhr1*  
269 mutants (Fig. 6C), but not for *crhr1* in XX biallelic *crhr2* mutant larvae (Fig. 6D),  
270 suggesting a molecular compensatory mechanism.

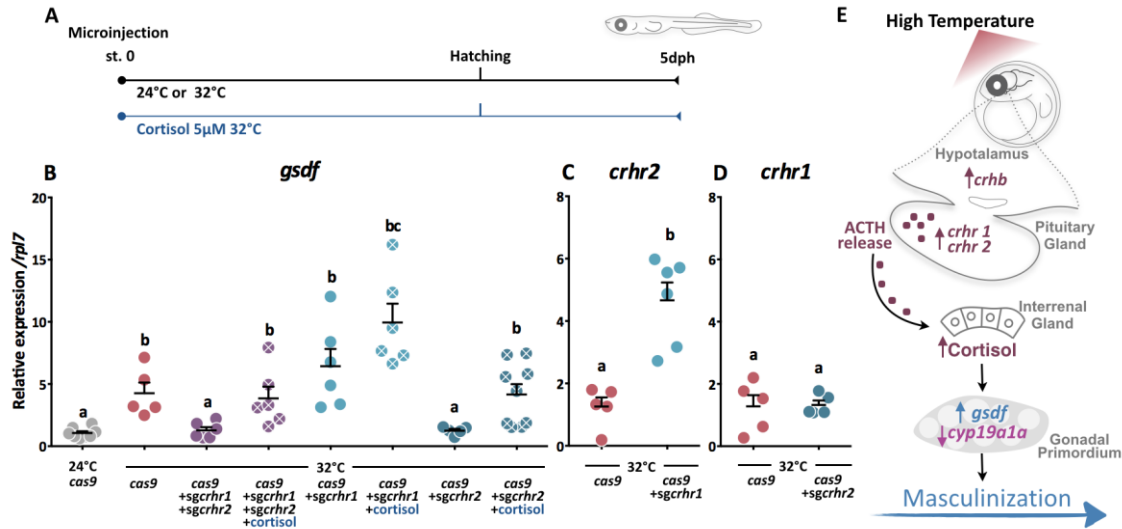

271

272 **Fig. 6.** Rescue of masculinization in biallelic *crhrs* mutants phenotype by cortisol treatment. (A)

273 Schematic representation of experimental procedure. (B) Gene expression profile of testicular gene

274 marker *gsdf* was analyzed in control (*cas9*), *cas9*+sgRNA-*crhr1*, *cas9*+sgRNA-*crhr2*, and *cas9*+sgRNA-

275 *crhr1*+sgRNA-*crhr2* treated with cortisol (5 μM) or vehicle (ethanol) between fertilization and 5 dph at

276 32 °C. Quantification of *crhr2* (C) and *crhr1* (D) expression in *cas9*+sgRNA-*crhr1* and -*crhr2* coinjected

277 larvae, respectively. Gene expression levels are expressed relatively to *cas9*+sgRNA-*crhr1* without

278 cortisol treatment (for panel B) and to *cas9* treatment (for panels C and D). Data were measured by qPCR

279 in whole embryos with the genotypic sex XX. Quantification method was performed using the  $2^{-\Delta\Delta Ct}$

280 method and values were normalized by the respective values of *rpl7*. Horizontal bars indicate mean, with

281 its respective standard error of the mean. Different letters indicate statistically significant differences

282 between treatments (FgStatistics;  $p < 0.05$ ). (E) Schematic representation of the proposed mechanism by

283 which the CNS, through the corticotropin releasing hormone b (*crhb*) and its receptors (*crhr1* and *crhr2*)

284 are the transducer of stress-induced masculinization.



285 **DISCUSSION**

286 Environmental factors that act during the critical period of fish gonadal development are  
287 able to alter sex ratios, especially toward males (Fernandino et al., 2013; Ospina-  
288 Álvarez & Piferrer, 2008). Even presenting established genotypic sex-determining  
289 mechanisms with known sex-determining genes, many fish species produce male-  
290 skewed sex ratios when environmental temperatures are elevated during early  
291 development. However, whether this phenomenon has any adaptive value or not is  
292 unknown for the vast majority of species. Although the understanding of this  
293 mechanism has great interest for basic biology and the perspective of global climate  
294 change, the pathways that mediate environmental cues and gonadal fate, and the  
295 involvement of extra-gonadal organs in this process are still unknown. Our results  
296 demonstrate for the first time the fundamental role of the CNS as the transducer in a  
297 form of environmental sex determination (ESD), through the regulation of the HPI axis.

298 In the current work we demonstrated that, during the gonadal sex determination period,  
299 the HPI axis is active. Moreover, we proved that out of two *crh* paralogs, only *crhb* was  
300 up-regulated at high masculinizing temperatures along embryonic development. In  
301 medaka, the *crha* gene was previously misidentified as a new member of Crh family  
302 and named as *telocortin (tcn)*. The expression of *crha* has been mainly observed in the  
303 retina, with a weak expression in the brain (Kohei Hosono et al., 2015). In another  
304 teleost, *Astatotilapia burtoni*, the presence of *crha* has been related to the mediation of  
305 social information or stress responses in the visual system, facilitating signal processing  
306 before it even reaches the brain (Grone & Maruska, 2015). These previous results are in

307 concordance with our observations, in which *crha* transcription does not seem to be  
308 induced by environmental stressors, such as high temperature. Besides *crha* and *crhb*,  
309 other members of the *crh* family genes are present in the medaka genome, such as the  
310 *uts1*, *ucn2*, and *ucn3* (K. Hosono et al., 2017). Known as urocortins, these genes code  
311 for neuropeptides that share structural similarity with *crhs*, and can act as additional  
312 endogenous ligands for CRH receptors. In mice, they have been involved in stress  
313 responses and also anxiety (Bale & Vale, 2004; Sztainberg & Chen, 2012).  
314 Nevertheless, neither of the urocortins was up-regulated during the sex determination  
315 period at high, masculinization temperature.

316 Regarding *crhb*, the high expression pattern at HT was in agreement with results of  
317 other well-known stress responses, at its role in regulating the release of glucocorticoids  
318 (Alderman & Bernier, 2009; Carpenter et al., 2014; Chen & Fernald, 2008; Grone &  
319 Maruska, 2015). Moreover, a similar pattern was obtained for others genes of the Crh-  
320 related pathway, crucial to the HPI axis is active (Lovejoy & de Lannoy, 2013), during  
321 the gonadal sex determination period, as for the *crh* receptors, *crhr1* and *crhr2*. In  
322 medaka, the first peak of cortisol occurs in 2 dph larvae, when animals are reared at  
323 normal breeding temperatures (Trayer, Hwang, Prunet, & Thermes, 2013). However,  
324 Hayashi et al. (Hayashi et al., 2010) and our study showed an early rise in cortisol in  
325 embryos reared at HT, at the time of the gonadal sex determination period, evidencing  
326 an earlier activation of mechanisms involved in the surge of cortisol levels. On this  
327 regard, the high expression of *crhb* and their receptors, *crhr1* and *crhr2*, in our study is  
328 consistent with the timing of cortisol increase. Notably, the overlapping between the

329 timing of early activation of the HPI axis and the gonadal sex determination period is  
330 crucial to understand how high levels of cortisol are triggered and are related to male-  
331 skewed sex ratio (Hattori et al., 2009; Hayashi et al., 2010). Subsequently, in order to  
332 validate our hypothesis, we disrupted the HPI axis with biallelic mutation in both *crhrs*.  
333 These mutants were characterized by a lack of cortisol response at HT, down-regulation  
334 of testicular gene markers, and the concomitant inhibition of sex reversal  
335 (masculinization in XX) induced by stress. Thus, double biallelic *crhrs* mutants  
336 phenocopied the previous results on the inhibition of cortisol synthesis, with the absence  
337 of sex reversal in genotypic females (Hayashi et al., 2010). These observations  
338 corroborate for first time the participation of the brain in the stress-induced  
339 masculinization.

340 In all vertebrates, CRH regulates the synthesis and release of ACTH (Mommsen et al.,  
341 1999; Wendelaar Bonga, 1997) through their transmembrane receptors in the pituitary  
342 gland (Lovejoy et al., 2014). In the present work, although *acth* transcript abundance  
343 did not show any change during the gonadal sex determination period and under stress  
344 conditions, we detected low intensities of Acth-ir in HT embryos that could be  
345 explained by a stimulation of Acth release by thermal stress. Moreover, biallelic  
346 mutations of *crhrs* showed an accumulation of Acth in the pituitary, phenocopying the  
347 high fluorescence pattern of control group. Furthermore, these Acth accumulation or  
348 release are in concordance with the cortisol levels observed in each loss of *crhrs*  
349 function mutants. In mammals, both CRH and CRHR1 are associated with the HPA axis  
350 at the initial stress response whereas CRHR2 plays a major role during the chronic and

351 later response to stress (Lovejoy & de Lannoy, 2013). CRHR1 knockout mice showed  
352 reduced stress-induced release of ACTH and corticosterone, providing evidence that  
353 CRHR1 mediates stress-induced hormone activation (Smith et al., 1998; Timpl et al.,  
354 1998). On the other hand, CRHR2-deficient mice possessed a generally normal  
355 initiation of the stress-response, but later on an early disruption of the ACTH release,  
356 suggesting that CRHR2 is also involved in the maintenance of HPA axis drive (Coste et  
357 al., 2000). In view of these considerations, our data are in accordance with results  
358 reported in mice, since the loss of function in each of receptors, *crhr1* or *crhr2*, or both  
359 together, resulted in a decrease of Acth release. Such disruption in HPI axis was  
360 demonstrated to be crucial for female-to-male sex reversal in our studies with medaka  
361 under high, stressful temperatures.

362 An in depth analysis on the molecular responses in each *crhrs* loss-of-function under  
363 thermal stress showed that, although embryos coinjected with *cas9*+*sgRNA-crhr1* or  
364 *crhr2* presented an early inhibition of *gsdf* expression, an increased cortisol level was  
365 observed at the end of the gonadal sex determination period when only one of the *crhr*  
366 was biallelically mutated. However, the level of cortisol in the double *crhr* biallelic  
367 mutant was completely suppressed. In each of biallelic *crhr* mutant is necessary taking  
368 into account that the paralog is fully active, explaining these partial compensation, and  
369 only half of sex reversal. In the second case, the strong decreased in cortisol level of the  
370 double *crhrs* mutants resembled the absence of stress response observed without an  
371 environmental stressor, with the concomitant absent of female sex reversal. In addition,  
372 the double *crhr* mutant phenocopied previous results observed by the cortisol synthesis

373 inhibition in medaka (Hayashi et al., 2010), with the absence of sex reversal. Taken  
374 together, these results highlight the importance of the involvement of both Crh receptors  
375 in fish masculinization induced by environmental stressors.

376 Once the HPI axis has translated the stimulus of an environmental stressor, is important  
377 to know how cortisol transduces this response to masculinize the gonad. In some fish,  
378 including medaka, has been proposed that gonadal aromatase, an enzyme involved in  
379 estradiol synthesis, or other genes related to its regulation, such as FTZ-F1 - the  
380 ortholog of mammalian steroidogenic factor1 – are inhibited by cortisol (Hayashi et al.,  
381 2010; Navarro-Martin et al., 2011; Yamaguchi et al., 2010). Furthermore, in pejerrey  
382 (*Odontesthes bonariensis*) has been suggested that androgens, synthesized through the  
383 action of *hsd11b2*, are considered as mediators of stress (Fernandino et al., 2012;  
384 Fernandino et al., 2013). Our results confirm that *cyp19a1a* transcription is suppressed  
385 at HT, and demonstrated that high transcription levels can be rescued in double biallelic  
386 *crhrs* mutants.

387 Three different results, including (i) disruption of HPI axis, (ii) the increase of testicular  
388 gene markers with the concomitant decrease of sex reversal of genotypic females, and  
389 (iii) the rescue of masculinization with cortisol, support the fact CNS is involved in the  
390 sex reversal induced by environmental stressors (as summarized in the Fig. 6E), as  
391 contrasting to genotypic sex determination in which the sexual fate decision begins from  
392 the gonad.

393

## 394 MATERIAL AND METHODS

### 395 *Source of animals and experimental conditions*

396 Fertilized eggs of *O. latipes* were incubated in Petri disks of 70 mm with embryo  
397 medium (17 mM NaCl, 0.4 mM KCl, 0.27 mM CaCl<sub>2</sub>·2H<sub>2</sub>O and 0.66 mM MgSO<sub>4</sub>; pH  
398 7) at 24 °C (CT) or 32 °C (HT). Sampling was performed at stages 26, 33, 37, 39, and at  
399 5, 20 or 60 days after hatching (dah) (Iwamatsu, 2004). These stages corresponded to  
400 the end of primordial germ cells (PGCs) migration and the formation of the gonadal  
401 primordium (stage 26), the beginning of *dmy/dmrt1bY* transcription in gonadal somatic  
402 cells (stage 33), the sexual dimorphism in PGCs proliferation (stage 35-37), and to the  
403 maximum PGCs proliferation in XX embryos and latest embryo stage of the gonadal  
404 sex determination period (stage 39) (Saito et al., 2007). Based on previous work, we  
405 know that 5-dph larvae are sensitive to cortisol treatment (Hayashi et al., 2010), that 20-  
406 dph fish can easily be assessed for gonadal sex morphology, and that 60-dph animals  
407 have grown as adult fish to assess survivorship. The strain hi-medaka (ID: MT835) was  
408 supplied from the National BioResource Project (NBRP) Medaka  
409 ([www.shigen.nig.ac.jp/medaka/](http://www.shigen.nig.ac.jp/medaka/)). All fish were maintained and fed following standard  
410 protocols to medaka (M. Kinoshita, Murata, Naruse, & Tanaka, 2012). Fish were  
411 handled in accordance with the Universities Federation for Animal Welfare Handbook  
412 on the Care and Management of Laboratory Animals ([www.ufaw.org.uk](http://www.ufaw.org.uk)) and internal  
413 institutional regulations.

### 414 *RNA and quantification by RT-qPCR*

415 Total RNA was extracted from individual embryos using the RNAqueos®-Micro kit  
416 (Ambion by Life Technologies) for stage 26, the Illustra RNAspin Mini was used for  
417 stage 33, and 350 µL of TRIzol® Reagent (Life Technologies) used for stage 37, 39,  
418 and 5 dph, following the manufacturer's instructions. To perform the cDNA synthesis,  
419 RNA of each individual sample (250 ng) was treated with Deoxyribonuclease I  
420 Amplification Grade (Life Technologies) and reverse-transcribed using SuperScript II  
421 (Life Technologies) with oligo(dT) following the manufacturer's instructions. Each  
422 primer pair was previously validated analyzing the melting curve, efficiency between  
423 95-105%, with a slope of around -3.30 and a R2 value > 0.99. Real-time PCR primers  
424 are listed in Table S1. Samples were analyzed with Step One Plus Real-Time PCR  
425 System (Applied Biosystems). The amplification protocol consisted of an initial cycle of  
426 1 min at 95 °C, followed by 10 s at 95 °C and 30 s at 60 °C for a total of 45 cycles. The  
427 subsequent quantification method was performed using the  $2^{-\Delta\Delta C_t}$  method (threshold  
428 cycle; [www.appliedbiosystems.com/support/apptech](http://www.appliedbiosystems.com/support/apptech)) and normalized against reference  
429 gene values for ribosomal protein L7 (*rpl7*) (Z. Zhang & Hu, 2007).

#### 430 ***Sexing of embryos by PCR***

431 Each embryo of stages 33, 37, 39, and 5-dph and 20-dph larvae was analyzed to  
432 determine its genotypic sex. Animals were subjected to DNA analysis for the presence  
433 of the *dmy/dmrt1bY* gene. For this purpose, we collected DNA from each RNA  
434 extraction following manufacturer's instructions. A PCR analysis was then performed  
435 using primers for *dmy* (Nanda et al., 2002) and the presence of *β-actin* gene was used as

436 a DNA loading control (Table S1) (Hattori et al., 2007). The PCR products were  
437 analyzed on a 1% agarose gel.

#### 438 ***CRISPR/Cas9 target site design and single guide RNA (sgRNA) construction***

439 CRISPR/Cas9 target sites were designed using the CCTop - CRISPR/Cas9 target online  
440 predictor ([crispr.cos.uni-heidelberg.de/index.html](http://crispr.cos.uni-heidelberg.de/index.html))(Stemmer et al., 2015), which  
441 identified sequence 5' GG-(N18)-NGG3' in exon 7 of *crhr1*  
442 (TTGAGGAACATCATCCAC TGG) and exon 10 of *crhr2*  
443 (GAGGCAGCAAGACGAGTG TGG) (Fig. S2A and S2C). Each sgRNA was  
444 synthesized by cloning the annealed oligonucleotides into the sgRNA expression vector  
445 pDR274 (Addgene #42250) (Hwang et al., 2013) followed by *in vitro* transcription,  
446 previously established by Ansai and Kinoshita (Ansai & Kinoshita, 2014). Briefly, a  
447 pair of oligonucleotides at final concentration of 10 mM each was annealed in 10 mL of  
448 annealing buffer (40 mM Tris-HCl [pH 8.0], 20 mM MgCl<sub>2</sub>, and 50 mM NaCl) by  
449 heating to 95°C for 2 min and then cooling slowly to 25°C. Then, the pDR274 vector  
450 was digested with BsaI-HF (New England Biolabs), and the annealed oligonucleotides  
451 were ligated into the pDR274 vector. The sgRNA expression vectors were digested by  
452 DraI, and the sgRNAs were synthesized using the MEGAshortscript T7 Transcription  
453 Kit (Thermo Fisher Scientific). The synthesized sgRNAs were purified by RNeasy Mini  
454 kit purification (QIAGEN). These RNA sequences were diluted to 50 ng/μL.

#### 455 ***Capped Cas9 RNA synthesis***



456 The capped *cas9* (nCas9n RNA) was transcribed from pCS2-nCas9n plasmid (Addgene  
457 #47929). First, the plasmid was linearized by NotI and capped *cas9* was synthesized by  
458 mMESSAGE mMACHINE SP6 kit (Life Technologies). The synthesized *cas9* was  
459 purified by RNeasy Mini kit purification (QIAGEN). These RNA sequences were  
460 diluted to 200 ng/ $\mu$ L.

#### 461 ***Microinjection into embryos***

462 Microinjection was performed into fertilized medaka eggs before the first cleavage as  
463 described previously (Masato Kinoshita, Kani, Ozato, & Wakamatsu, 2000). For  
464 CRISPR/Cas9 system, 25 ng/ $\mu$ l *sgRNA* and 100 ng/ $\mu$ L *cas9* were coinjected in 4.6 nL of  
465 RNA mixture. Embryos injected with *cas9* were used as controls. Microinjection was  
466 performed with a Nanoject II Auto-Nanoliter Injector (Drummond Scientific) coupled to  
467 a stereomicroscope (Olympus).

#### 468 ***DNA extraction to Heteroduplex mobility assay (HMA)***

469 To analyze the efficiency and specificity of the CRISPR/Cas9 system, 3 days post-  
470 fertilization embryos were used (Ansai & Kinoshita, 2014). Genomic DNA was  
471 extracted by incubating each medaka embryo in 25  $\mu$ L of 5 mM NaOH, 0.2 mM EDTA  
472 at 95°C for 5 min. After cooling to room temperature (RT) 25  $\mu$ L of 40 mM Tris-HCl,  
473 pH 8.0, was added to the extract. The supernatant was used as template for PCR to  
474 HMA. Conventional PCR analysis was performed with genomic DNA using primers  
475 listed in Table S1. Electrophoresis performed in 12 % acrylamide gel (Ota et al., 2013),

476 stained with ethidium bromide for 15 min before examination. PCR products were  
477 sequenced to confirm the presence of indels (Ansai & Kinoshita, 2014).

#### 478 ***Off-target analysis***

479 Potential off-target sites in the medaka genome were searched using a “Pattern Match”  
480 tool in New Medaka Map (beta) at the NBRP medaka web site  
481 (<http://viewer.shigen.info/medakavw/patternmatch>). All potential off-target sites  
482 identified were analyzed by HMA using the primers listed in Table S1.

#### 483 ***Biallelic mutant screening***

484 Crispant (injected embryos with *cas9*+sgRNA) fish were mated with wild-type ones  
485 from Himedaka strain. Genomic DNA was extracted from each F1 embryos for analysis  
486 of mutations by HMA, as described previously (Table S1). Mutant alleles in each  
487 embryo were determined by direct sequencing of the *crhr1* or *crhr2* gene region.

#### 488 ***Histological analysis***

489 Samples for histological examination of gonadal sex (n = 15 – 25/per group) were taken  
490 at 20 dph and analyzed following the criteria reported above (5). Firstly, the caudal fin  
491 was taken for gDNA extraction using conventional saline buffer extraction to determine  
492 genotypic sex and for HMA analysis (Aljanabi & Martinez, 1997). The body trunk was fixed  
493 in Bouin’s solution and processed according to standard protocols for preparation of  
494 hematoxylin-eosin stained histological sections. These preparations were examined  
495 under the Nikon ECLIPSE Ni-U microscope (Nikon) and captured with a Digit Sight  
496 DS-Fi2 digital camera (Nikon).

497 ***Immunofluorescence analysis of Acth***

498 Medaka embryos at stage 39 from the different treatments were used. All individuals  
499 were processed under the same condition for fixation, washing and incubation with  
500 serum and antibody. The stage 39 was chosen to analyze the release of Acth upon up-  
501 regulation of *crhb*, which was detected at stage 37. The tail was used for sex genotyping  
502 by PCR and HMA analysis and the rest of the body was fixed in Bouin's solution  
503 overnight. Sections were then washed with 0.1 M phosphate-buffered saline (PBS pH  
504 7.4) and blocked in 0.1 M PBS containing 0.5% of bovine serum albumin (Sigma-  
505 Aldrich) for 60 min before overnight incubation with a mixture of primary antibody  
506 against ACTH-NIDDK-anti-hATCH-IC-3 (rabbit, 1:250; kindly provided by Dante Paz,  
507 Universidad de Buenos Aires) at RT. After incubation, the sections were washed twice  
508 in PBS for 10 min each and incubated at RT for 90 min with the secondary antibody  
509 goat-anti-rabbit IgG (Life Technologies) conjugated with Alexa Fluor 488 (green), at a  
510 dilution of 1:2000 in PBS. Separate sets of slides were treated only with secondary  
511 antibody (negative controls). After incubation, sections were rinsed twice with PBS and  
512 mounted with mounting medium Fluoromount (Sigma Aldrich) containing 4',6-  
513 diamidino-2-phenylindole (DAPI, 5 µg/ml, Life Technologies). Section photographs  
514 were taken using the Nikon Eclipse E7000 and the Image Pro Plus (Media Cybernetcs)  
515 at same capture conditions of exposure and gain to all samples. Finally, images were  
516 analyzed and measured for fluorescence using ImageJ (<https://imagej.nih.gov/ij/>)  
517 employing the relation of the fluorescence intensity of the area of pituitary gland and the  
518 mean fluorescence of background.

519 ***Levels of cortisol***

520 Enzyme immunoassay (EIA) was performed using the Cortisol Express EIA Kit  
521 according to instructions from the manufacturer (Cayman Chemical, Ann Arbor, USA)  
522 and previously used by our group (Fernandino et al., 2012). Briefly, pools of 23-25  
523 embryos both sexes were immediately frozen at -80 °C, homogenized in 0.2 mL of PBS,  
524 and used for steroid extraction with 1 mL of diethyl ether. This procedure was repeated  
525 two times. After evaporation of the diethyl ether, samples were immediately  
526 resuspended in 2 mL EIA buffer and analyzed in a microplate reader (Rayto Model RT-  
527 2100C, Hong Kong) following the kit instructions. The recovery rate was estimated by  
528 the cold-spike method to be 0.85% and the intra- and inter-assay variation (CV%)  
529 ranged from 4 to 13%.

530 ***Rescue of biallelic mutant phenotype by cortisol treatment.***

531 Both *cas9*+sgRNA-*crhr1* and/or +sgRNA-*crhr2* coinjected fish were treated with 5 µM  
532 of cortisol (18) (11β-11,17,21-trihydroxypregn-4-ene-3,20-dione; Sigma-Aldrich) from  
533 fertilization to 5 dph. Briefly, after the injection with a mixture of sgRNA (*crhr1* and/or  
534 *crhr2*) and *cas9*, the embryos were placed in Petri dish of 70 mm with embryo rearing  
535 medium (25 mL) supplemented with cortisol or vehicle control (with the same volume  
536 of stock solvent: 4.53 µL ethanol, 0.018%). The medium was changed every day. Both  
537 groups were reared at HT.

538 ***Statistical analysis***

539 All values are presented as mean  $\pm$  standard error of the mean (SEM). Fold change and  
540 statistical analysis of RT-qPCR quantifications were performed by using FgStatistics  
541 interface (<http://sites.google.com/site/fgStatistics/>), based on the REST method from  
542 Pfaffl et al. (Pfaffl, Horgan, & Dempfle, 2002). The immunohistochemistry  
543 quantification was analyzed using  $\chi^2$ -distribution and statistical analyzes were  
544 performed using SPSS v20 program, using one-way Analysis of Variance (ANOVA),  
545 followed by a Tukey's multiple comparison test. The differences on sex ratio were  
546 analyzed with the Hypothesis Testing to Compare Two Population Proportions. All  
547 statistical differences were accepted as significant when  $p < 0.05$ .

548

#### 549 **ACKNOWLEDGMENTS**

550 We thank Gabriela C. López (INTECH) for helping with histological and  
551 immunohistochemical preparations. We also thank Masato Kinoshita (Kyoto  
552 University) for teaching and helping with CRISPR/Cas9 technique, Adrián Mutto  
553 (Instituto de Investigaciones Biotecnológicas-UNSAM) for helping with microinjections,  
554 and Ricardo S. Hattori (Unidade de Pesquisa e Desenvolvimento de Campos do Jordão,  
555 APTA/SAA) for helpful advice. We are grateful to NBRP Medaka  
556 (<https://shigen.nig.ac.jp/medaka/>) for providing hi-medaka (Strain ID: MT835).

557

558 **THIS WORK WAS SUPPORTED BY GRANTS FROM:** Consejo Nacional de  
559 Investigaciones Científicas y Técnicas, Fellowship Program for partial financing for a

560 short training period D2979/16 (to J.I.F.), Agencia Nacional de Promoción Científica y  
561 Tecnológica Grants 1565/14 and 2501/15 (to J.I.F.), and 2783/15 (to G.M.S.). This  
562 work was also supported by a Discovery Grant from the Natural Sciences and  
563 Engineering Research Council (NSERC) of Canada (RGPIN 418576-2012) and a  
564 Canada Research Chair (CRC) to VSL. DCCC and LFAP were supported by a PhD  
565 scholarship from the National Research Council (CONICET). JIF and GMS are  
566 members of the career of scientific researcher at the CONICET. DCCC and LFAP are  
567 Ph.D. scholarship from CONICET.

568

569 **ADDRESS ALL CORRESPONDENCE AND REQUESTS FOR REPRINTS TO:**

570 Juan Ignacio Fernandino, Av. Intendente Marino Km. 8.2 (B7130IWA). Chascomús,  
571 Provincia de Buenos Aires, Argentina. E-mail: [fernandino@intech.gov.ar](mailto:fernandino@intech.gov.ar).

572

573 **DISCLOSURE SUMMARY:** The authors have nothing to disclose.

574

575 **REFERENCES**

- 576 Aguilera, G., & Liu, Y. (2012). The molecular physiology of CRH neurons. *Frontiers in*  
577 *Neuroendocrinology*, 33(1), 67-84. doi: 10.1016/j.yfrne.2011.08.002  
578 Alderman, S. L., & Bernier, N. J. (2009). Ontogeny of the corticotropin-releasing factor  
579 system in zebrafish. *General and Comparative Endocrinology*, 164(1), 61-69.  
580 doi: 10.1016/j.ygcen.2009.04.007  
581 Aljanabi, S. M., & Martinez, I. (1997). Universal and rapid salt-extraction of high  
582 quality genomic DNA for PCR-based techniques. *Nucleic acids research*,  
583 25(22), 4692-4693.

- 584 Ansai, S., & Kinoshita, M. (2014). Targeted mutagenesis using CRISPR/Cas system in  
585 medaka. *Biol Open*, 3(5), 362-371. doi: 10.1242/bio.20148177
- 586 Backstrom, T., & Winberg, S. (2013). Central corticotropin releasing factor and social  
587 stress. *Front Neurosci*, 7, 117. doi: 10.3389/fnins.2013.00117
- 588 Bale, T. L., & Vale, W. W. (2004) CRF and CRF Receptors: Role in Stress  
589 Responsivity and Other Behaviors. Vol. 44. *Annual Review of Pharmacology*  
590 *and Toxicology* (pp. 525-557).
- 591 Bernier, N. J., Alderman, S. L., & Bristow, E. N. (2008). Heads or tails? Stressor-  
592 specific expression of corticotropin-releasing factor and urotensin I in the  
593 preoptic area and caudal neurosecretory system of rainbow trout. *Journal of*  
594 *Endocrinology*, 196(3), 637-648. doi: 10.1677/joe-07-0568
- 595 Capel, B. (2017). Vertebrate sex determination: evolutionary plasticity of a fundamental  
596 switch  
597 *Nature Reviews Genetics*, 18, 675. doi: 10.1038/nrg.2017.60
- 598 Carpenter, R. E., Maruska, K. P., Becker, L., & Fernald, R. D. (2014). Social  
599 opportunity rapidly regulates expression of CRF and CRF receptors in the brain  
600 during social ascent of a teleost fish, *Astatotilapia burtoni*. *PLoS ONE*, 9(5),  
601 e96632. doi: 10.1371/journal.pone.0096632
- 602 Coste, S. C., Kesterson, R. A., Heldwein, K. A., Stevens, S. L., Heard, A. D., Hollis, J.  
603 H., . . . Stenzel-Poore, M. P. (2000). Abnormal adaptations to stress and  
604 impaired cardiovascular function in mice lacking corticotropin-releasing  
605 hormone receptor-2. *Nature Genetics*, 24(4), 403-409. doi: 10.1038/74255
- 606 Chakraborty, T., Zhou, L. Y., Chaudhari, A., Iguchi, T., & Nagahama, Y. (2016). Dmy  
607 initiates masculinity by altering Gsdf/Sox9a2/Rspo1 expression in medaka  
608 (*Oryzias latipes*). *Scientific Reports*, 6, 19480. doi: 10.1038/srep19480
- 609 Chandler, C. H., Chadderdon, G. E., Phillips, P. C., Dworkin, I., & Janzen, F. J. (2012).  
610 Experimental evolution of the *Caenorhabditis elegans* sex determination  
611 pathway. *Evolution*, 66(1), 82-93. doi: doi:10.1111/j.1558-5646.2011.01420.x
- 612 Chandler, C. H., Phillips, P. C., & Janzen, F. J. (2008). The evolution of sex-  
613 determining mechanisms: lessons from temperature-sensitive mutations in sex  
614 determination genes in *Caenorhabditis elegans*. *Journal of Evolutionary*  
615 *Biology*, 22(1), 192-200. doi: 10.1111/j.1420-9101.2008.01639.x
- 616 Chen, C. C., & Fernald, R. D. (2008). Sequences, expression patterns and regulation of  
617 the corticotropin-releasing factor system in a teleost. *General and Comparative*  
618 *Endocrinology*, 157(2), 148-155. doi: 10.1016/j.ygcen.2008.04.003
- 619 Fernandino, J. I., Hattori, R. S., Kishi, A., Strüssmann, C. A., & Somoza, G. M. (2012).  
620 The cortisol and androgen pathways cross talk in high-temperature induced  
621 masculinization: 11 $\beta$ -hydroxysteroid dehydrogenase as a key enzyme.  
622 *Endocrinology*, 153(12), 6003-6011. doi: 10.1210/en.2012-1517
- 623 Fernandino, J. I., Hattori, R. S., Moreno Acosta, O. D., Strüssmann, C. A., & Somoza,  
624 G. M. (2013). Environmental stress-induced testis differentiation: Androgen as a  
625 by-product of cortisol inactivation. *General and Comparative Endocrinology*,  
626 192, 36-44. doi: 10.1016/j.ygcen.2013.05.024
- 627 Ge, C., Ye, J., Weber, C., Sun, W., Zhang, H., Zhou, Y., . . . Capel, B. (2018). The  
628 histone demethylase KDM6B regulates temperature-dependent sex

- 629           determination in a turtle species. *Science*, 360(6389), 645-648. doi:  
630           10.1126/science.aap8328
- 631   Grammatopoulos, D. K. (2012). Insights into mechanisms of corticotropin-releasing  
632   hormone receptor signal transduction. *Br J Pharmacol*, 166(1), 85-97. doi:  
633   10.1111/j.1476-5381.2011.01631.x
- 634   Grammatopoulos, D. K., & Chrousos, G. P. (2002). Functional characteristics of CRH  
635   receptors and potential clinical applications of CRH-receptor antagonists. *Trends*  
636   *in Endocrinology and Metabolism*, 13(10), 436-444. doi: 10.1016/S1043-  
637   2760(02)00670-7
- 638   Grone, B. P., & Maruska, K. P. (2015). Divergent evolution of two corticotropin-  
639   releasing hormone (CRH) genes in teleost fishes. *Frontiers in Neuroscience*,  
640   9(OCT), 365. doi: 10.3389/fnins.2015.00365
- 641   Hattori, R. S., Fernandino, J. I., Kishii, A., Kimura, H., Kinno, T., Oura, M., . . .  
642   Watanabe, S. (2009). Cortisol-induced masculinization: does thermal stress  
643   affect gonadal fate in pejerrey, a teleost fish with temperature-dependent sex  
644   determination? *PLoS ONE*, 4(8), e6548. doi: 10.1371/journal.pone.0006548
- 645   Hattori, R. S., Gould, R. J., Fujioka, T., Saito, T., Kurita, J., Strüssmann, C. A., . . .  
646   Watanabe, S. (2007). Temperature-dependent sex determination in Hd-rR  
647   medaka *Oryzias latipes*: Gender sensitivity, thermal threshold, critical period,  
648   and DMRT1 expression profile. *Sex. Dev.*, 1(2), 138-146. doi:  
649   10.1159/000100035
- 650   Hayashi, Y., Kobira, H., Yamaguchi, T., Shiraishi, E., Yazawa, T., Hirai, T., . . . Kitano,  
651   T. (2010). High temperature causes masculinization of genetically female  
652   medaka by elevation of cortisol. *Mol Reprod Dev*, 77(8), 679-686. doi:  
653   10.1002/mrd.21203
- 654   Holsboer, F., & Ising, M. (2008). Central CRH system in depression and anxiety -  
655   Evidence from clinical studies with CRH1 receptor antagonists. *European*  
656   *Journal of Pharmacology*, 583(2-3), 350-357. doi: 10.1016/j.ejphar.2007.12.032
- 657   Hosono, K., Kikuchi, Y., Miyanishi, H., Hiraki-Kajiyama, T., Takeuchi, A., Nakasone,  
658   K., . . . Okubo, K. (2015). Teleocortin: A Novel Member of the CRH Family in  
659   Teleost Fish. *Endocrinology*, 156(8), 2949-2957. doi: 10.1210/en.2015-1042
- 660   Hosono, K., Yamashita, J., Kikuchi, Y., Hiraki-Kajiyama, T., & Okubo, K. (2017).  
661   Three urocortins in medaka: identification and spatial expression in the central  
662   nervous system. 29(5). doi: 10.1111/jne.12472
- 663   Hwang, W. Y., Fu, Y., Reyon, D., Maeder, M. L., Tsai, S. Q., Sander, J. D., . . . Joung,  
664   J. K. (2013). Efficient genome editing in zebrafish using a CRISPR-Cas system.  
665   *Nat Biotechnol*, 31(3), 227-229. doi: 10.1038/nbt.2501
- 666   Imai, T., Saino, K., & Matsuda, M. (2015). Mutation of Gonadal soma-derived factor  
667   induces medaka XY gonads to undergo ovarian development. *Biochemical and*  
668   *Biophysical Research Communications*, 467(1), 109-114. doi:  
669   10.1016/j.bbrc.2015.09.112
- 670   Iwamatsu, T. (2004). Stages of normal development in the medaka *Oryzias latipes*.  
671   *Mechanisms of Development*, 121(7-8), 605-618. doi:  
672   10.1016/j.mod.2004.03.012



- 673 Kinoshita, M., Kani, S., Ozato, K., & Wakamatsu, Y. (2000). Activity of the medaka  
674 translation elongation factor 1 $\alpha$ -A promoter examined using the GFP gene as a  
675 reporter. *Development, Growth & Differentiation*, 42(5), 469-478. doi:  
676 10.1046/j.1440-169x.2000.00530.x
- 677 Kinoshita, M., Murata, K., Naruse, K., & Tanaka, M. (2012). *Medaka: Biology,*  
678 *Management, and Experimental Protocols*. Iowa, USA: Wiley-Blackwell.
- 679 Kitano, T., Hayashi, Y., Shiraishi, E., & Kamei, Y. (2012). Estrogen rescues  
680 masculinization of genetically female medaka by exposure to cortisol or high  
681 temperature. *Mol Reprod Dev*, 79(10), 719-726. doi: 10.1002/mrd.22080
- 682 Kovacs, K. J. (2013). CRH: the link between hormonal-, metabolic- and behavioral  
683 responses to stress. *J Chem Neuroanat*, 54, 25-33. doi:  
684 10.1016/j.jchemneu.2013.05.003
- 685 Kurokawa, H., Saito, D., Nakamura, S., Katoh-Fukui, Y., Ohta, K., Baba, T., . . .  
686 Tanaka, M. (2007). Germ cells are essential for sexual dimorphism in the  
687 medaka gonad. *Proceedings of the National Academy of Sciences of the United*  
688 *States of America*, 104(43), 16958-16963. doi: 10.1073/pnas.0609932104
- 689 Liu, N. A., Huang, H., Yang, Z., Herzog, W., Hammerschmidt, M., Lin, S., & Melmed,  
690 S. (2003). Pituitary corticotroph ontogeny and regulation in transgenic zebrafish.  
691 *Mol Endocrinol*, 17(5), 959-966. doi: 10.1210/me.2002-0392
- 692 Lovejoy, D. A., Chang, B. S. W., Lovejoy, N. R., & del Castillo, J. (2014). Molecular  
693 evolution of GPCRs: CRH/CRH receptors. *Journal of Molecular*  
694 *Endocrinology*, 52(3), T43-T60. doi: 10.1530/JME-13-0238
- 695 Lovejoy, D. A., & de Lannoy, L. (2013). Evolution and phylogeny of the corticotropin-  
696 releasing factor (CRF) family of peptides: Expansion and specialization in the  
697 vertebrates. *J Chem Neuroanat*, 54, 50-56. doi: 10.1016/j.jchemneu.2013.09.006
- 698 Mankiewicz, J. L., Godwin, J., Holler, B. L., Turner, P. M., Murashige, R., Shamey, R.,  
699 . . . Borski, R. J. (2013). Masculinizing effect of background color and cortisol  
700 in a flatfish with environmental sex-determination. *Integr Comp Biol*, 53(4),  
701 755-765. doi: 10.1093/icb/ict093
- 702 Mommsen, T., Vijayan, M. M., & Moon, T. (1999). Cortisol in teleosts: dynamics,  
703 mechanisms of action, and metabolic regulation. *Fish Physiol. Biochem.*, 211-  
704 268. doi: 10.1023/A:1008924418720
- 705 Montero, D., Terova, G., Rimoldi, S., Tort, L., Negrin, D., Zamorano, M. J., &  
706 Izquierdo, M. (2015). Modulation of adrenocorticotrophin hormone (ACTH)-  
707 induced expression of stress-related genes by PUFA in inter-renal cells from  
708 European sea bass (*Dicentrarchus labrax*). *Journal of Nutritional Science*, 4,  
709 e16. doi: 10.1017/jns.2015.6
- 710 Mork, L., Czerwinski, M., & Capel, B. (2014). Predetermination of sexual fate in a  
711 turtle with temperature-dependent sex determination. *Developmental Biology*,  
712 386(1), 264-271. doi: <https://doi.org/10.1016/j.ydbio.2013.11.026>
- 713 Nakamura, M. (2009). Sex determination in amphibians. *Seminars in Cell and*  
714 *Developmental Biology*, 20(3), 271-282. doi: 10.1016/j.semcd.2008.10.003
- 715 Nakamura, S., Watakabe, I., Nishimura, T., Toyoda, A., Taniguchi, Y., & Tanaka, M.  
716 (2012). Analysis of medaka *sox9* orthologue reveals a conserved role in germ  
717 cell maintenance. *PLoS ONE*, 7(1), e29982. doi: 10.1371/journal.pone.0029982

- 718 Nanda, I., Kondo, M., Hornung, U., Asakawa, S., Winkler, C., Shimizu, A., . . . Schartl,  
719 M. (2002). A duplicated copy of DMRT1 in the sex-determining region of the Y  
720 chromosome of the medaka, *Oryzias latipes*. *Proc. Natl. Acad. Sci. U. S. A.*,  
721 99(18), 11778-11783. doi: 10.1073/pnas.182314699
- 722 Navarro-Martin, L., Vinas, J., Ribas, L., Diaz, N., Gutierrez, A., Di Croce, L., &  
723 Piferrer, F. (2011). DNA methylation of the gonadal aromatase (*cyp19a*)  
724 promoter is involved in temperature-dependent sex ratio shifts in the European  
725 sea bass. *PLoS Genet.*, 7(12), e1002447. doi: 10.1371/journal.pgen.1002447
- 726 Nozu, R., & Nakamura, M. (2015). Cortisol administration induces sex change from  
727 ovary to testis in the protogynous wrasse, *Halichoeres trimaculatus*. *Sexual*  
728 *Development*, 9(2), 118-124. doi: 10.1159/000373902
- 729 Ospina-Álvarez, N., & Piferrer, F. (2008). Temperature-dependent sex determination in  
730 fish revisited: Prevalence, a single sex ratio response pattern, and possible  
731 effects of climate change. *PLoS ONE*, 3(7), e2837. doi:  
732 10.1371/journal.pone.0002837
- 733 Ota, S., Hisano, Y., Muraki, M., Hoshijima, K., Dahlem, T. J., Grunwald, D. J., . . .  
734 Kawahara, A. (2013). Efficient identification of TALEN-mediated genome  
735 modifications using heteroduplex mobility assays. *Genes Cells*, 18(6), 450-458.  
736 doi: 10.1111/gtc.12050
- 737 Pfaffl, M. W., Horgan, G. W., & Dempfle, L. (2002). Relative expression software tool  
738 (REST©) for group-wise comparison and statistical analysis of relative  
739 expression results in real-time PCR. *Nucleic acids research*, 30(9), e36. doi:  
740 10.1093/nar/30.9.e36
- 741 Ribas, L., Liew, W. C., Díaz, N., Sreenivasan, R., Orbán, L., & Piferrer, F. (2017).  
742 Heat-induced masculinization in domesticated zebrafish is family-specific  
743 & yields a set of different gonadal transcriptomes. *Proceedings of the*  
744 *National Academy of Sciences of the United States of America*, 114(6), E941-  
745 E950. doi: 10.1073/pnas.1609411114
- 746 Saito, D., Morinaga, C., Aoki, Y., Nakamura, S., Mitani, H., Furutani-Seiki, M., . . .  
747 Tanaka, M. (2007). Proliferation of germ cells during gonadal sex differentiation  
748 in medaka: Insights from germ cell-depleted mutant *zenzai*. *Dev. Biol.*, 310(2),  
749 280-290. doi: 10.1016/j.ydbio.2007.07.039
- 750 Shibata, Y., Paul-Prasanth, B., Suzuki, A., Usami, T., Nakamoto, M., Matsuda, M., &  
751 Nagahama, Y. (2010). Expression of gonadal soma derived factor (*Gsdf*) is  
752 spatially and temporally correlated with early testicular differentiation in  
753 medaka. *Gene Expression Patterns*, 10(6), 283-289. doi:  
754 10.1016/j.gep.2010.06.005
- 755 Smith, G. W., Aubry, J. M., Dellu, F., Contarino, A., Bilezikjian, L. M., Gold, L. H., . . .  
756 Lee, K. F. (1998). Corticotropin releasing factor receptor 1-deficient mice  
757 display decreased anxiety, impaired stress response, and aberrant  
758 neuroendocrine development. *Neuron*, 20(6), 1093-1102. doi: 10.1016/S0896-  
759 6273(00)80491-2
- 760 Stemmer, M., Thumberger, T., del Sol Keyer, M., Wittbrodt, J., & Mateo, J. L. (2015).  
761 CCTop: An Intuitive, Flexible and Reliable CRISPR/Cas9 Target Prediction  
762 Tool. *PLoS ONE*, 10(4), e0124633. doi: 10.1371/journal.pone.0124633

- 763 Sztainberg, Y., & Chen, A. (2012). Neuropeptide Regulation of Stress-Induced  
764 Behavior: Insights from the CRF/Urocortin Family In D. W. Pfaff & J. E.  
765 Levine (Eds.), *Handbook of Neuroendocrinology* (pp. 355-375). San Diego:  
766 Academic Press.
- 767 Timpl, P., Spanagel, R., Sillaber, I., Kresse, A., Reul, J. M. H. M., Stalla, G. K., . . .  
768 Wurst, W. (1998). Impaired stress response and reduced anxiety in mice lacking  
769 a functional corticotropin-releasing hormone receptor 1. *Nature Genetics*, *19*(2),  
770 162-166. doi: 10.1038/520
- 771 Trayer, V., Hwang, P. P., Prunet, P., & Thernes, V. (2013). Assessment of the role of  
772 cortisol and corticosteroid receptors in epidermal ionocyte development in the  
773 medaka (*Oryzias latipes*) embryos. *General and Comparative Endocrinology*,  
774 *194*, 152-161. doi: 10.1016/j.ygcen.2013.09.011
- 775 Tsalafouta, A., Papandroulakis, N., Gorissen, M., Katharios, P., Flik, G., & Pavlidis, M.  
776 (2014). Ontogenesis of the HPI axis and molecular regulation of the cortisol  
777 stress response during early development in *Dicentrarchus labrax*. *Scientific*  
778 *Reports*, *4*. doi: 10.1038/srep05525
- 779 Vaughan, J., Donaldson, C., Bittencourt, J., Perrin, M. H., Lewis, K., Sutton, S., . . .  
780 Vale, W. (1995). Urocortin, a mammalian neuropeptide related to fish urotensin  
781 I and to corticotropin-releasing factor. *Nature*, *378*(6554), 287-292.
- 782 Wendelaar Bonga, S. E. (1997). The stress response in fish. *Physiol. Rev.*, *77*, 591-625.
- 783 Yamaguchi, T., & Kitano, T. (2012). High temperature induces cyp26b1 mRNA  
784 expression and delays meiotic initiation of germ cells by increasing cortisol  
785 levels during gonadal sex differentiation in Japanese flounder. *Biochem.*  
786 *Biophys. Res. Commun.*, *419*(2), 287-292. doi: 10.1016/j.bbrc.2012.02.012
- 787 Yamaguchi, T., Yoshinaga, N., Yazawa, T., Gen, K., & Kitano, T. (2010). Cortisol is  
788 involved in temperature-dependent sex determination in the Japanese flounder.  
789 *Endocrinology*, *151*(8), 3900-3908. doi: 10.1210/en.2010-0228
- 790 Yamamoto, Y., Hattori, R. S., Kitahara, A., Kimura, H., Yamashita, M., & Strussmann,  
791 C. A. (2013). Thermal and endocrine regulation of gonadal apoptosis during sex  
792 differentiation in pejerrey *Odontesthes bonariensis*. *Sex Dev*, *7*(6), 316-324. doi:  
793 10.1159/000353506
- 794 Yatsu, R., Miyagawa, S., Kohno, S., Saito, S., Lowers, R. H., Ogino, Y., . . . Iguchi, T.  
795 (2015). TRPV4 associates environmental temperature and sex determination in  
796 the *American alligator*. *Scientific Reports*, *5*, 18581. doi: 10.1038/srep18581
- 797 Zhang, X., Guan, G., Li, M., Zhu, F., Liu, Q., Naruse, K., . . . Hong, Y. (2016).  
798 Autosomal gsdf acts as a male sex initiator in the fish medaka. *Scientific*  
799 *Reports*, *6*, 19738. doi: 10.1038/srep19738
- 800 Zhang, Z., & Hu, J. (2007). Development and Validation of Endogenous Reference  
801 Genes for Expression Profiling of Medaka (*Oryzias latipes*) Exposed to  
802 Endocrine Disrupting Chemicals by Quantitative Real-Time RT-PCR.  
803 *Toxicological Sciences*, *95*(2), 356-368. doi: 10.1093/toxsci/kfl161
- 804 Zhou, L., Charkraborty, T., Zhou, Q., Mohapatra, S., Nagahama, Y., & Zhang, Y.  
805 (2016). Rspo1-activated signalling molecules are sufficient to induce ovarian  
806 differentiation in XY medaka (*Oryzias latipes*). *Scientific Reports*, *6*, 19543. doi:  
807 10.1038/srep19543
